# Supplementary material
Source: Springer Nature journal article supplement (https://www.springermedizin.de/resource/supplementary/13023_2008_129_MOESM6_ESM.pdf/9641694)

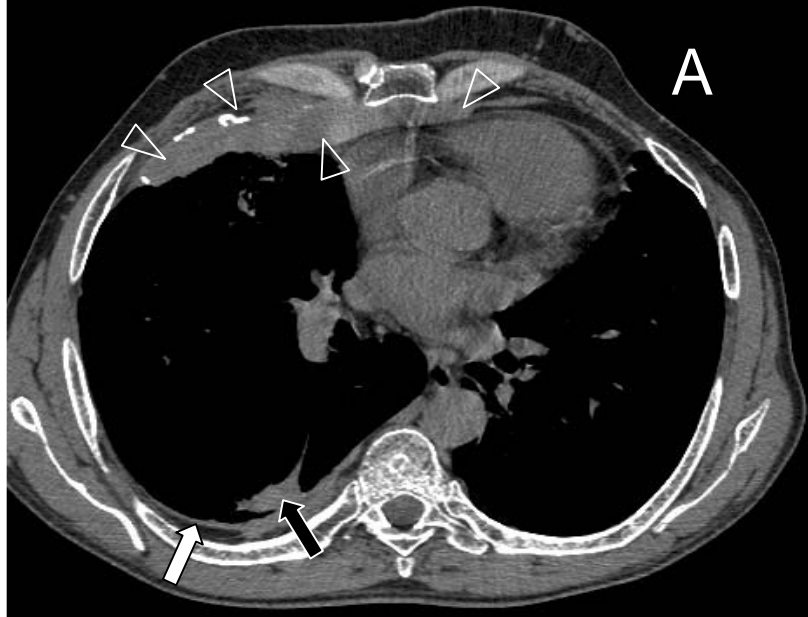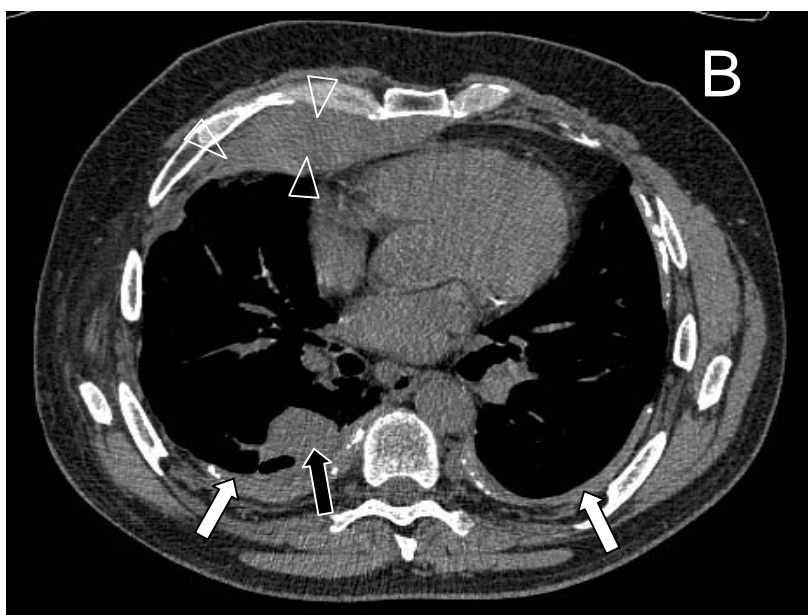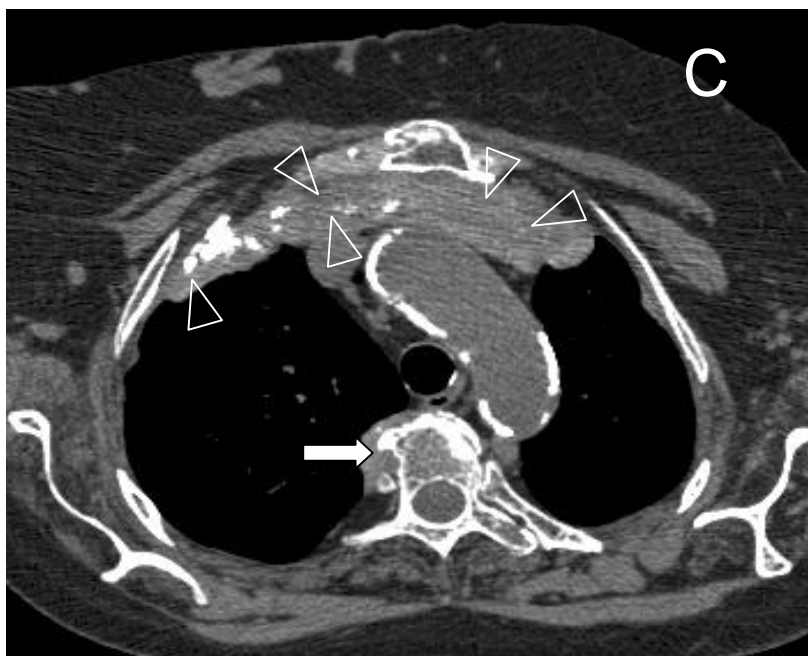

Supplement: MOESM6 [file 9641694]
